# Supplementary material
Source: publisher figshare collection journal article supplement (https://sage.figshare.com/ndownloader/files/20098457)
Supplement: Supplementary file 1 [file 20098457]

## Sheet: Sheet1
Supplementary Table 2: Candidate fusion transcripts identified by RNA-sequencing in the well- and de-differentiated liposarcoma components.
Case	5' Gene	3' Gene	5' Chromo-some	3' Chromo-some	5' breakpoint	3' breakpoint	Fusion Type	Crossing Reads	Encompassing Reads	In frame	Driver Probability (Oncofuse)	Present in normals TCGA/ FFPE normals	Validated by RT-PCR (primer sequences for validation) or fluorescence in situ hybridization (FISH)
DDLPS	LMNB2	MAP2K6	19	17	2456667	67516412	Inter_Chromosomal	6	10	Yes	0.99947	No	Validated (RT-PCR) Forward 1: 5'- GGCTCCTGCTAAGATCTCA; Reverse 1: 5'-TCTGGAATTGTCTGGCCTTT; Forward 2: 5'-GCTGCAGGAGAAGGAGGAG; Reverse 2: 5'-GCTCCATGCAGATCCACAC
DDLPS	CAMKK2	SETD1B	12	12	121698123	122246113	Intra_Chromosomal	4	9	No	0.998395	No	Not performed
DDLPS	KIF5A	HMGA2	12	12	57973199	66269130	Intra_Chromosomal	15	15	Yes	0.975517	No	Not validated (FISH)
DDLPS	MDM2	SPTBN4	12	19	69222710	41055094	Inter_Chromosomal	2	3	No	0.964653	No	Not performed
DDLPS	TRAM2	C6orf62	6	6	52441594	24716552	Intra_Chromosomal	1	2	Yes	0.956122	No	Not validated (RT-PCR)
DDLPS	AL831948	TMEM120B	12	12	48113481	122181534	Intra_Chromosomal	2	11	No	0.423906	No	Not performed
WDLPS	TLK2	FAM157B	17	9	60637484	141134067	Inter_Chromosomal	7	2	Yes	0.272277	No	Not performed
DDLPS	CTDSP2	CSRNP2	12	12	58221335	51470430	Intra_Chromosomal	50	88	Yes	0.143734	No	Not performed
DDLPS	TMEM181	SCAF8	6	6	158994553	155099133	Intra_Chromosomal	2	5	No	0.136788	No	Not performed
DDLPS	SLC11A2	XRCC6BP1	12	12	51420095	58345539	Intra_Chromosomal	8	3	No	0.128278	No	Not performed
WDLPS	TRAPPC8	CPM	18	12	29426679	69265736	Inter_Chromosomal	1	3	Yes	0.0387627	No	Not performed
DDLPS	TRPV4	PRPH	12	12	110247822	49692135	Intra_Chromosomal	6	4	No	0.0257224	No	Not performed
WDLPS	DCN	DGKA	12	12	91550847	56345412	Intra_Chromosomal	59	118	No	0.00859831	No	Not performed
WDLPS	DCTN2	TMEM233	12	12	57939812	120067540	Intra_Chromosomal	8	8	No	0.0078833	No	Not performed
DDLPS	HMGA2	CEP290	12	12	66232350	88462421	Intra_Chromosomal	2	3	No	0.00646181	No	Not performed
DDLPS	ANAPC5	MDM1	12	12	121784697	68717018	Intra_Chromosomal	1	4	No	0.0048351	No	Not performed
WDLPS	KIF5A	NCKAP1L	12	12	57944182	54893138	Intra_Chromosomal	1	2	No	0.00361065	No	Not performed
WDLPS	CCDC60	CCDC73	12	11	119943109	32676517	Inter_Chromosomal	2	3	No	0.000857474	No	Not performed
DDLPS	RPS21	ETHE1	20	19	60962731	44015717	Inter_Chromosomal	28	13	Yes	7.11e-05	No	Not performed
